# Supplementary material for: Electrical and thermal stimulus-responsive nanocarbon-based 3D hydrogel sponge for switchable drug delivery
Source: Royal Society of Chemistry journal article supplement (doi:10.1039/d1nr06074k), 2022-01-01
Supplement: d1nr06074k1.pdf [file d1nr06074k1.pdf]

## Supporting Information

# Electrical and Thermal Stimulus-responsive Nanocarbon-based 3D Hydrogel Sponge for Switchable Drug Delivery

*Sang-Yu Park<sup>a</sup>, Ji-Hye Kang<sup>b,c</sup>, Han-Sem Kim<sup>c</sup>, Ji-Young Hwang<sup>a\*</sup>, and Ueon Sang Shin<sup>b,c\*</sup>*

<sup>a</sup> Innovative Carbon-Bio-Convergence Lab., Korea Carbon Industry Promotion Agency (kcarbon), 110-11 Ballyong-ro, Deokjin-gu, Jeonju 54853, Republic of Korea

<sup>b</sup> Department of Nanobiomedical Science, BK21 FOUR NBM Global Research Center for Regenerative Medicine, Dankook University, Cheonan 31116, Republic of Korea

<sup>c</sup> Institute of Tissue Regeneration Engineering (ITREN), Dankook University, 119 Dandae-ro, Dongnam-gu, Cheonan 31116, Republic of Korea

\* Correspondence addresses to [jyhwang@kcarbon.or.kr](mailto:jyhwang@kcarbon.or.kr) and [usshin12@dankook.ac.kr](mailto:usshin12@dankook.ac.kr)

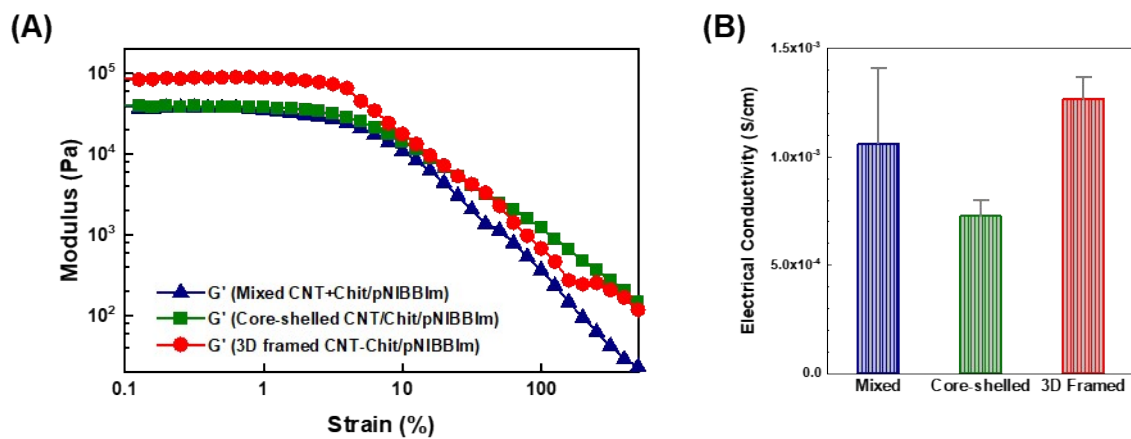

**Fig. S1. Mechanical and electrical properties of each hydrogel.** (A) Comparative plot of the  $G'$  values and (B) the electrical conductivity of the three hydrogels.

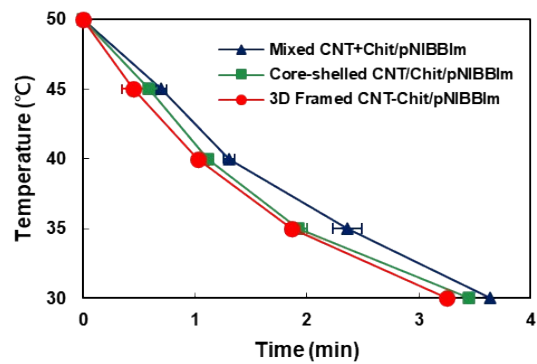

**Fig. S2. Cooling experiments of each hydrogel.** Temperature ( $^{\circ}\text{C}$ ) decreasing of the three hydrogels according with time.

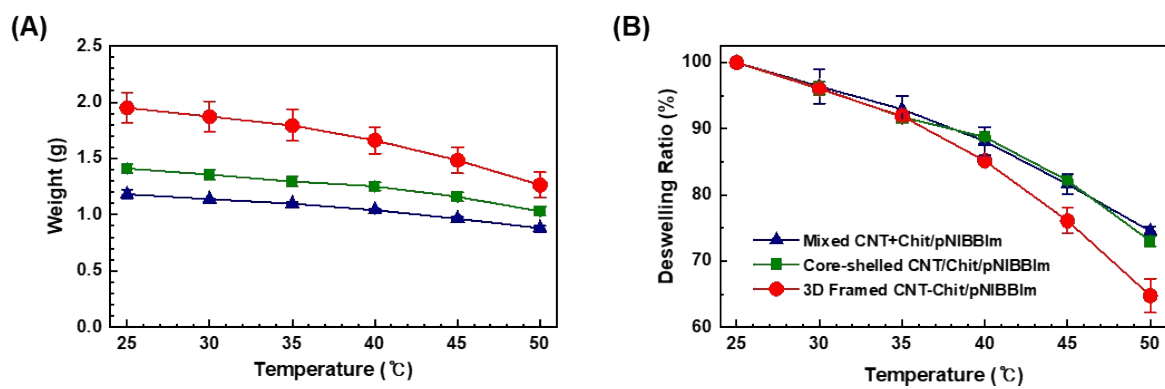

**Fig. S3. Analysis of swelling and deswelling properties.** (A) Weight changes from 50 to 25 °C of the three hydrogels and (B) relative deswelling ratio of the gel types of each hydrogel.

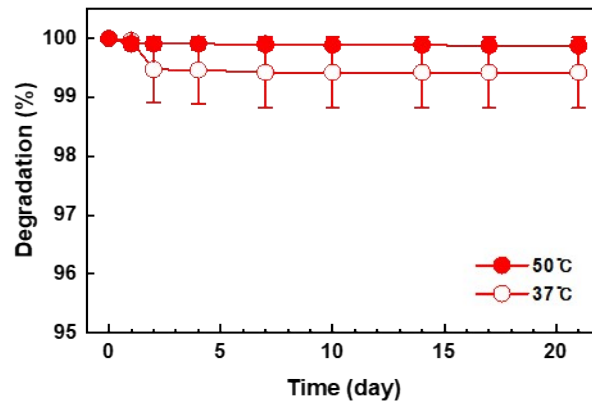

**Fig. S4.** Degradation of the 3D framed CNT-Chit/pNIBBIIm hydrogel at 37 °C and 50 °C for 21 days (n=3).

**Table S1.** Summary of characteristics of each hydrogel.

| Sample Name                   | Storage modulus (kPa)* | Critical strain (%) | Surface resistivity ( $\Omega/\text{sq}$ ) | Volume resistivity ( $\Omega\cdot\text{cm}$ ) | Electrical conductivity (S/cm)                | $\Delta T_{\text{pt}}$ ( $^{\circ}\text{C}$ ) | $T_{\text{pt}}$ ( $^{\circ}\text{C}$ ) | $R_{\text{hsw}}$ (%)** | KTP loading (mg/mg) |
|-------------------------------|------------------------|---------------------|--------------------------------------------|-----------------------------------------------|-----------------------------------------------|-----------------------------------------------|----------------------------------------|------------------------|---------------------|
| Mixed CNT+Chit/pNIBBIm        | 35                     | 9.96                | $1279.8 \pm 475.6$                         | $1022.3 \pm 380.9$                            | $1.06 \times 10^{-3} \pm 0.35 \times 10^{-3}$ | 36-44                                         | 39                                     | 25.4                   | $3.17 \pm 0.17$     |
| Core-shelled CNT/Chit/pNIBBIm | 38                     | 9.96                | $1731.3 \pm 161.2$                         | $1385.3 \pm 128.9$                            | $0.73 \times 10^{-3} \pm 0.07 \times 10^{-3}$ | 36-42                                         | 40                                     | 27.0                   | $3.14 \pm 0.23$     |
| 3D framed CNT-Chit/pNIBBIm    | 89                     | 6.28                | $701.5 \pm 23.4$                           | $793.3 \pm 61.2$                              | $1.27 \times 10^{-3} \pm 1.01 \times 10^{-3}$ | 36-42                                         | 39                                     | 35.2                   | $3.86 \pm 0.05$     |

\* Modulus indicates the maximum elastic response of three types of hydrogels.

\*\* Swelling ratio ( $R_{\text{hsw}}$ ) within phase transition temperature range ( $\Delta T_{\text{pt}}$ ) and average phase transition temperature ( $T_{\text{pt}}$ ) for three types of hydrogels within the temperature range from 50  $^{\circ}\text{C}$  to 25  $^{\circ}\text{C}$ .
